# Supplementary material for: Neutralizing antibody titres in SARS-CoV-2 infections
Source: PubMed Central journal article supplement (PMC7782739; doi:10.1038/s41467-020-20247-4), 2021-01-04
Supplement: 41467_2020_20247_MOESM2_ESM.pdf [file 41467_2020_20247_MOESM2_ESM.pdf]

**Editorial Note:** This manuscript has been previously reviewed at another journal that is not operating a transparent peer review scheme. The manuscript was considered suitable for publication without further review at *Nature Communications*.
